# Supplementary material
Source: PubMed Central journal article supplement (PMC8020804)
Supplement: pnas.2012748118.sapp.pdf [file pnas.2012748118.sapp.pdf]

## **Supplementary Information Text**

### **Extended Materials and Methods**

#### *Cell culture*

BPH1, LNCaP, PC3, C4-2, C4-2MDVR, 22RV1, CWRR1 and DU145 cells were maintained in RPMI 1640 medium (Gibco 11875), NCI-H660 cells were cultured in RPMI 1640 medium with 1% Insulin Transferrin Selenium, 0.02% Hydrocortisone and 0.02% Beta-estradiol. LAPC4 cells were maintained in IMDM medium (Gibco 12440). RWPE1 cells were cultured in keratinocyte serum-free medium (Gibco). All medium was supplemented with 10% fetal bovine serum (FBS) (Corning) and 1% penicillin-streptomycin (Gibco). Androgen deprived therapy (ADT) in LNCaP and LAPC4 cells was carried out by using RPMI 1640 (Gibco 11835 phenol red free) and IMDM (Gibco 21056 phenol red free), respectively, supplemented with 10% charcoal dextran stripped fetal bovine serum (CS-FBS) (Denville) and 1% penicillin-streptomycin. LNCaP95 cells were cultured in RPMI 1640 (Gibco 11835) with 10% CS-FBS. Experiments of LNCaP, PC3, C4-2 and C4-2MDVR cells under deprived glutamine or deprived glucose culture conditions were performed by using RPMI 1640 medium without glutamine (Gibco 21870) or RPMI 1640 medium without glucose (Corning 10-043-CV) supplemented with sodium pyruvate (Gibco).

#### *3'UTR luciferase assays and site-directed mutagenesis*

The 3'UTR DNA fragments of human GLS1 were generated by PCR from human genomic DNA of LNCaP. The PCR products of GLS1-3'UTR were inserted into the *Renilla* luciferase plasmid pRL-CMV reporter vector (Promega) between *XbaI* and

*NotI* sites. The mutagenesis of GLS1-3'UTR was performed using the QuikChange II XL site-directed mutagenesis kit (Agilent Technologies). A *firefly* luciferase plasmid pGL3 control (Promega) was used to normalize the transfection efficiency. All the primer sequences for PCR, mutagenesis and sequencing are available in *SI Appendix*, Table. S1. For luciferase assay, LNCaP cells were seeded in 12-well plates. After 48 hours incubation, cells were co-transfected with 1.2  $\mu\text{g}$  constructed pRL-CMV plasmid and 0.3  $\mu\text{g}$  pGL3 control plasmid for 2 hours using Xfect Transfection Reagent (Clontech). Then the medium was changed to CS-FBS medium for 10 hours before addition of ethanol vehicle or 10 nM DHT for 12 hours. After 24 hours, luciferase activities were measured using the Dual-Luciferase Reporter Assay System (Promega).

### *Cell proliferation assay*

Cells were plated in 6-well plates. For LNCaP cells,  $4 \times 10^4$  cells were seeded in 2 ml medium while for C4-2, C4-2MDVR and PC-3 cells,  $1 \times 10^4$  cells were seeded initially. To deprive glutamine or glucose, cells were plated in complete culture medium, which was replaced with glutamine-free or glucose-free medium supplemented with 10% FBS on the following day. Fresh medium was changed every three days. At the indicated time points, cells were counted using trypan blue (Gibco). MTS assay was performed in 96-well plates with initial cell number of 1000/well. For cell proliferation of ADT treatment with deprivation of glutamine/glucose and addition of glutamine/glucose experiment, medium was set up as followings: Glutamine (+)/glucose (+): glutamine, glucose and phenol red free medium (Gibco A14430)

added with 2 mM glutamine (Gibco) and 11 mM glucose (Sigma). Glutamine (-)/glucose (+): glutamine, glucose and phenol red free medium added with 11 mM glucose. Glutamine (++)/glucose (+): glutamine, glucose and phenol red free medium added with 4 mM glutamine and 11 mM glucose. Glutamine (+)/glucose (-): glutamine, glucose and phenol red free medium added with 2 mM glutamine. Glutamine (+)/glucose (++): glutamine, glucose and phenol red free medium added with 2 mM glutamine and 22 mM glucose. 1000/well LNCaP cells were seeded in 96-well plates in regular medium changed by the corresponding medium supplemented with 10% CS-FBS after cells settled down. To observe the inhibition of CB-839 (MedChemExpress), RWPE1, LNCaP and PC3 cells with the indicated concentrations of drug were seeded 1000/well in 96-well plate and incubated for 72 hours. MTS assay (Biovision) was performed to measure cell viability at the indicated time points per manufacturer's protocol. IC<sub>50</sub> values were calculated using a four parameter curve fit (Graphpad Prism).

### *Metabolite extraction and mass spectrometry*

As described previously(1),  $1 \times 10^5$  cells were plated in 6-well plates. After cells settled down, for experiment of LNCaP and LAPC4 treated by ADT, 2 ml RPMI 1640 medium (Gibco 11835) or IMDM with either regular FBS or CS-FBS were used to replace the original culture medium after being washed by cold PBS. Corresponding medium was refreshed every five days. For experiments of glutamine deprivation in comparison of LNCaP with PC3 cells, 2 ml complete RPMI 1640 medium (Gibco 11875) and RPMI 1640 glutamine free medium (Gibco 21870) were employed. At

each time point, for intracellular metabolites measurement, plates were placed on dry ice immediately. Medium was aspirated and 80% HPLC grade methanol/water was added. For measurement of metabolites extraction from medium, medium was collected in an Eppendorf tube. 100% pre-cold methanol was added to make the final concentration of methanol at 80%. Then the plates or tubes were transferred in a -80°C freezer for 15 minutes and cells were scraped into extraction solvent. After centrifuge for 10 minutes, supernatant was transferred into a new Eppendorf tube. A speed vacuum was used to dry the samples at room temperature. The dry pellets were sent for further LC/MS analysis. Data were normalized to cell number.

### *<sup>13</sup>C isotope tracing assay*

1\*10<sup>5</sup> cells were seeded in 6-well plates in 2 ml complete medium. After overnight incubation, medium was removed, washed with PBS and replaced by fresh glutamine/glucose-deprived medium (either Gibco 32404, Gibco 21870 or Gibco 11966 for LNCaP ADT glutamine-tracing, LNCaP vs PC3 and C4-2 vs C4-2MDVR glutamine-tracing or LAPC4 glucose-tracing, respectively) containing 2 mM <sup>13</sup>C-glutamine/4.5 g/L <sup>13</sup>C-glucose isotope (Cambridge). For ADT experiment, LNCaP/LAPC4 cells were treated in RPMI 1640 medium (Gibco 11835) containing either FBS or CS-FBS for two weeks prior to the tracing experiment. After 24 hours incubation with isotopomer, metabolites were extracted and sent for further LC/MS analysis.

### *Gene silencing and overexpression*

KGA and GAC knockdown was achieved by stable transduction with shRNA

lentivirus. Lentiviral plasmids expressing shRNAs purchased from Genecopoeia (shGAC: Cat#CS-HSH058798-LVRU6MP; shKGA: Cat#CS-HSH007722-LVRU6MP) were packaged into lentivirus and infected into cells. 24 hours post-infection, cells were selected with 2 µg/ml puromycin for 7 days. Puromycin-resistant cells were pooled, amplified and analysis. AR transient knock down was performed by two sets of siRNAs purchased from Dharmacon. c-Myc-specific siRNA pool was purchased from Santa Cruz (sc-29226). Crispr sgRNA plasmids were purchased from GeneCopoeia (HCP258798-CG12-3-B). Cells were transfected by sgRNAs via Lipofectamine LTX (Invitrogen) followed by geneticin selection. Protein knockdown and knockout were confirmed by western blotting. Targeted sequences are listed in *SI Appendix*, Table. S2. For GAC and KGA overexpression, ORF plasmids were purchased from Genecopoeia (EX-T0320-Lv122 and EX-H0487-Lv105) and packaged into lentivirus for cell infection. c-Myc cDNA plasmid was a gift kindly given by Dr. Jung Wook Park(2). Overexpressed GAC, KGA and c-Myc proteins were confirmed by western blot.

### *RNA extraction and quantitative real-time PCR*

Total RNA was extracted using RNeasy mini kits (Qiagen, Valencia, CA). The PrimeScript RT Master Mix (Takara) was used for cDNA synthesis. Quantitative real-time PCR (qRT-PCR) was performed on ABI 7500 (Applied Biosystems, Foster City, CA) using SYBR Green PCR Master Mix (Quanta Biosciences). Actin expression assay was used as an internal control. All qPCRs were performed in triplicate. The primers used are listed in *SI Appendix*, Table. S2.

### *Chromatin immunoprecipitation assays*

Chromatin immunoprecipitation (ChIP) assays were performed as described previously(3). LNCaP cells were cultured in 5% CS-FBS medium for 3 days and then treated with either 10 nM dihydrotestosterone (DHT) or ethanol vehicle for 4 hours. Chromatin was crosslinked for 10 minutes at room temperature with 1% formaldehyde added to cell culture medium. Cell lysates were sonicated for 3 cycles, 10 seconds on, 30 seconds off using a Bioruptor sonicator (Thomas Scientific). Protein G-conjugated agarose beads were used to immunoprecipitate chromatin complexes and all subsequent steps were performed per manufacturer's protocol (Millipore). After de-crosslinking, phenol extraction and ethanol precipitation, quantitative PCR was employed on genomic DNA targets by SYBR Green PCR Master Mix (Quanta Biosciences). Primers and antibodies used are listed in *SI Appendix*, Table. S2 and S3 respectively.

### *Immunoblotting*

Total protein lysate was collected by lysing adherent cells/tumor tissues with RIPA buffer (Sigma) supplemented with phosphatase and protease inhibitor cocktail (Thermo Fisher). Lysates were cleared by centrifugation and protein concentration in supernatant was determined by the Bradford assay kit (Bio-rad). Equal amounts of total protein were used for immunoblotting. After electrophoresis, the proteins were transferred to polyvinylidene difluoride transfer membrane (PVDF) followed by blocked in 5% non-fat milk and incubated with indicated antibodies. After washing with TBST (TBS with 0.1% Tween), corresponding secondary antibodies conjugated

with horseradish peroxidase-conjugated (HRP) were used to incubate the membranes. Samples were developed by Chemiluminescent Substrate (Thermo Fisher) and exposed by Odyssey Imaging Systems (LI-COR). The commercial antibodies used can be found in *SI Appendix*, Table. S3.

### *Tissue Microarrays*

Several tissue microarrays were constructed and have been reported previously(4, 5). All human tissues were provided to investigators in a de-identified manner to protect patient confidentiality. Treatment-naïve samples were obtained from prostatectomy specimens including prostate cancer and the adjacent benign prostate tissue. Three cores were from benign and cancer areas of each specimen. Castration-resistant prostate cancer (CRPC) tissue microarray was built from patients who treated with hormonal therapy instead of surgery at the very beginning of prostatic adenocarcinoma diagnosis and underwent transurethral resection of prostate due to the recurred tumor which cause urinary obstruction. Tissues were histologically diagnosed as adenocarcinoma and constructed into a tissue microarray of CRPC. A small cell neuroendocrine carcinoma tissue microarray was constructed from primary small cell neuroendocrine carcinoma cases.

### *Immunohistochemistry*

Endogenous peroxidase activity was blocked with 3% hydrogen peroxide in methanol. Heat-induced antigen retrieval (HIER) was carried out for all sections in 0.01 M citrate buffer, pH 6.0, using a steamer at 95 °C. Primary antibodies were diluted with PBS containing 1% BSA and applied to the whole sections. Incubation was for 45

minutes at room temperature followed by incubation with a Dako EnVision+System-HRP Labelled Polymer for 30 minutes at room temperature. Diaminobenzidine was then applied for 10 minutes. The sections were counterstained with hematoxylin, dehydrated, coverslipped and visualized. All the primary antibodies and concentration are listed in *SI Appendix*, Table. S3. Quick-score system was performed in all the immunohistochemistry staining tissues as reported(5). The intensity of staining is multiplied by the percentage of staining to derive a composite score (a range from 0 to 300).

### *Colony formation assay*

As described previously(6),  $10^4$  cells were seeded at 6 cm dishes and grown for up to 14 days with either vehicle or CB-839 treatment. Cell culture medium was refreshed every 3 days and colonies were fixed with cold methanol and then stained with 1% crystal violet. The number of colonies was counted and representative pictures were imaged with a VersaDoc Imaging System (BioRad).

### *Three-dimension matrigel invasion assay*

As described previously(7), 1000 cells/well were seeded in the 96-well round-bottomed plates and incubated at 37°C, 5% CO<sub>2</sub>, 95% humidity to facilitate spheroid formation. After four days incubation, equal amount of matrigel was added and incubated till matrigel was solidified. Starting from time zero, and at 24-hour intervals up to 7 days, images were captured and invasive cell number and invasion distance were quantified.

### *Animal experiments*



$10^7$  cells were injected subcutaneously in intact male NSG mice (Jackson Laboratories). When tumors reached  $\sim 200 \text{ mm}^3$ , for experimental groups, mice were surgically castrated. For control groups, mice were performed with a tiny incision and suture procedure at perineum. Tumor growth was followed by caliper measurement twice a week and volumes of individual tumors were normalized to those on day 0 (day of castration). After castrated for 50 days, mice were euthanized and tumors were harvested. For long-term castration experiment, animals were euthanized after tumor recurred significantly or tumor volumes exceeded  $1000 \text{ mm}^3$ . For drug experiments, LNCaP and PC3 cells were injected subcutaneously in the mice with subsequent either vehicle or CB-839 200 mg/kg oral administration(8). Harvested tumors were embedded into paraffin followed by hematoxylin and eosin staining and immunohistochemistry staining.

### *Bioinformatics analysis of gene expression*

Gene Set Enrichment Analysis (GSEA) was performed using GSEA v4.0.2 software (<http://www.broadinstitute.org/gsea/index.jsp>) with 1000 gene-set permutations using the gene-ranking metric T-test with Hallmark and GO MSigDb collections as specified in the figures. Heat-map representation of metabolite level was generated using Morpheus (Broad Institute). Datasets for determining c-Myc and N-Myc expression were retrieved from cBioPortal as well as Beltran et al, 2016. TCGA dataset was used for determining KGA and GAC variant expression and patient clinical outcomes.

### *Minigene assay*

The gBlock, which contains exon 14-19 and their flanking intron regions of *GLSI* gene, was synthesized by Integrated DNA Technologies (IDT) and used as the template for PCR amplification. The DNA fragment product was cloned into the plasmid vector pRL-TK (Promega) between NheI and XbaI sites. DNA sequencing confirmed the integrity of the final construct, which was subsequently transfected into desired cells. KGA and GAC specific primers were used to determine the transcript levels by qPCR.

#### Immunocytochemical staining assay

20 million cells were harvested by washing with PBS and spun down to collect cell pellets. Using 10% formaldehyde to fix cells for 24 hours. Fixed cell pellets were further spun down to remove 10% formaldehyde and washed with PBS, followed by embedded into paraffin blocks. Antibodies were used to stain slides following immunohistochemistry procedures.

#### *Statistical analysis*

Statistically significant differences between two groups were assessed using a two-tailed paired or unpaired *t*-test. Comparisons between more than two groups were carried out by an ANOVA with Tukey's multiple-comparisons test. The Pearson correlation was used to analyze the correlation between KGA and GAC staining scores. Differences were considered statistically significant at a *p* value <0.05. Principal component analysis and pathway impact analysis were performed by MetaboAnalyst online software (<http://www.metaboanalyst.ca/>). All statistical analyses were performed using GraphPad Prism software and Microsoft Excel and R.



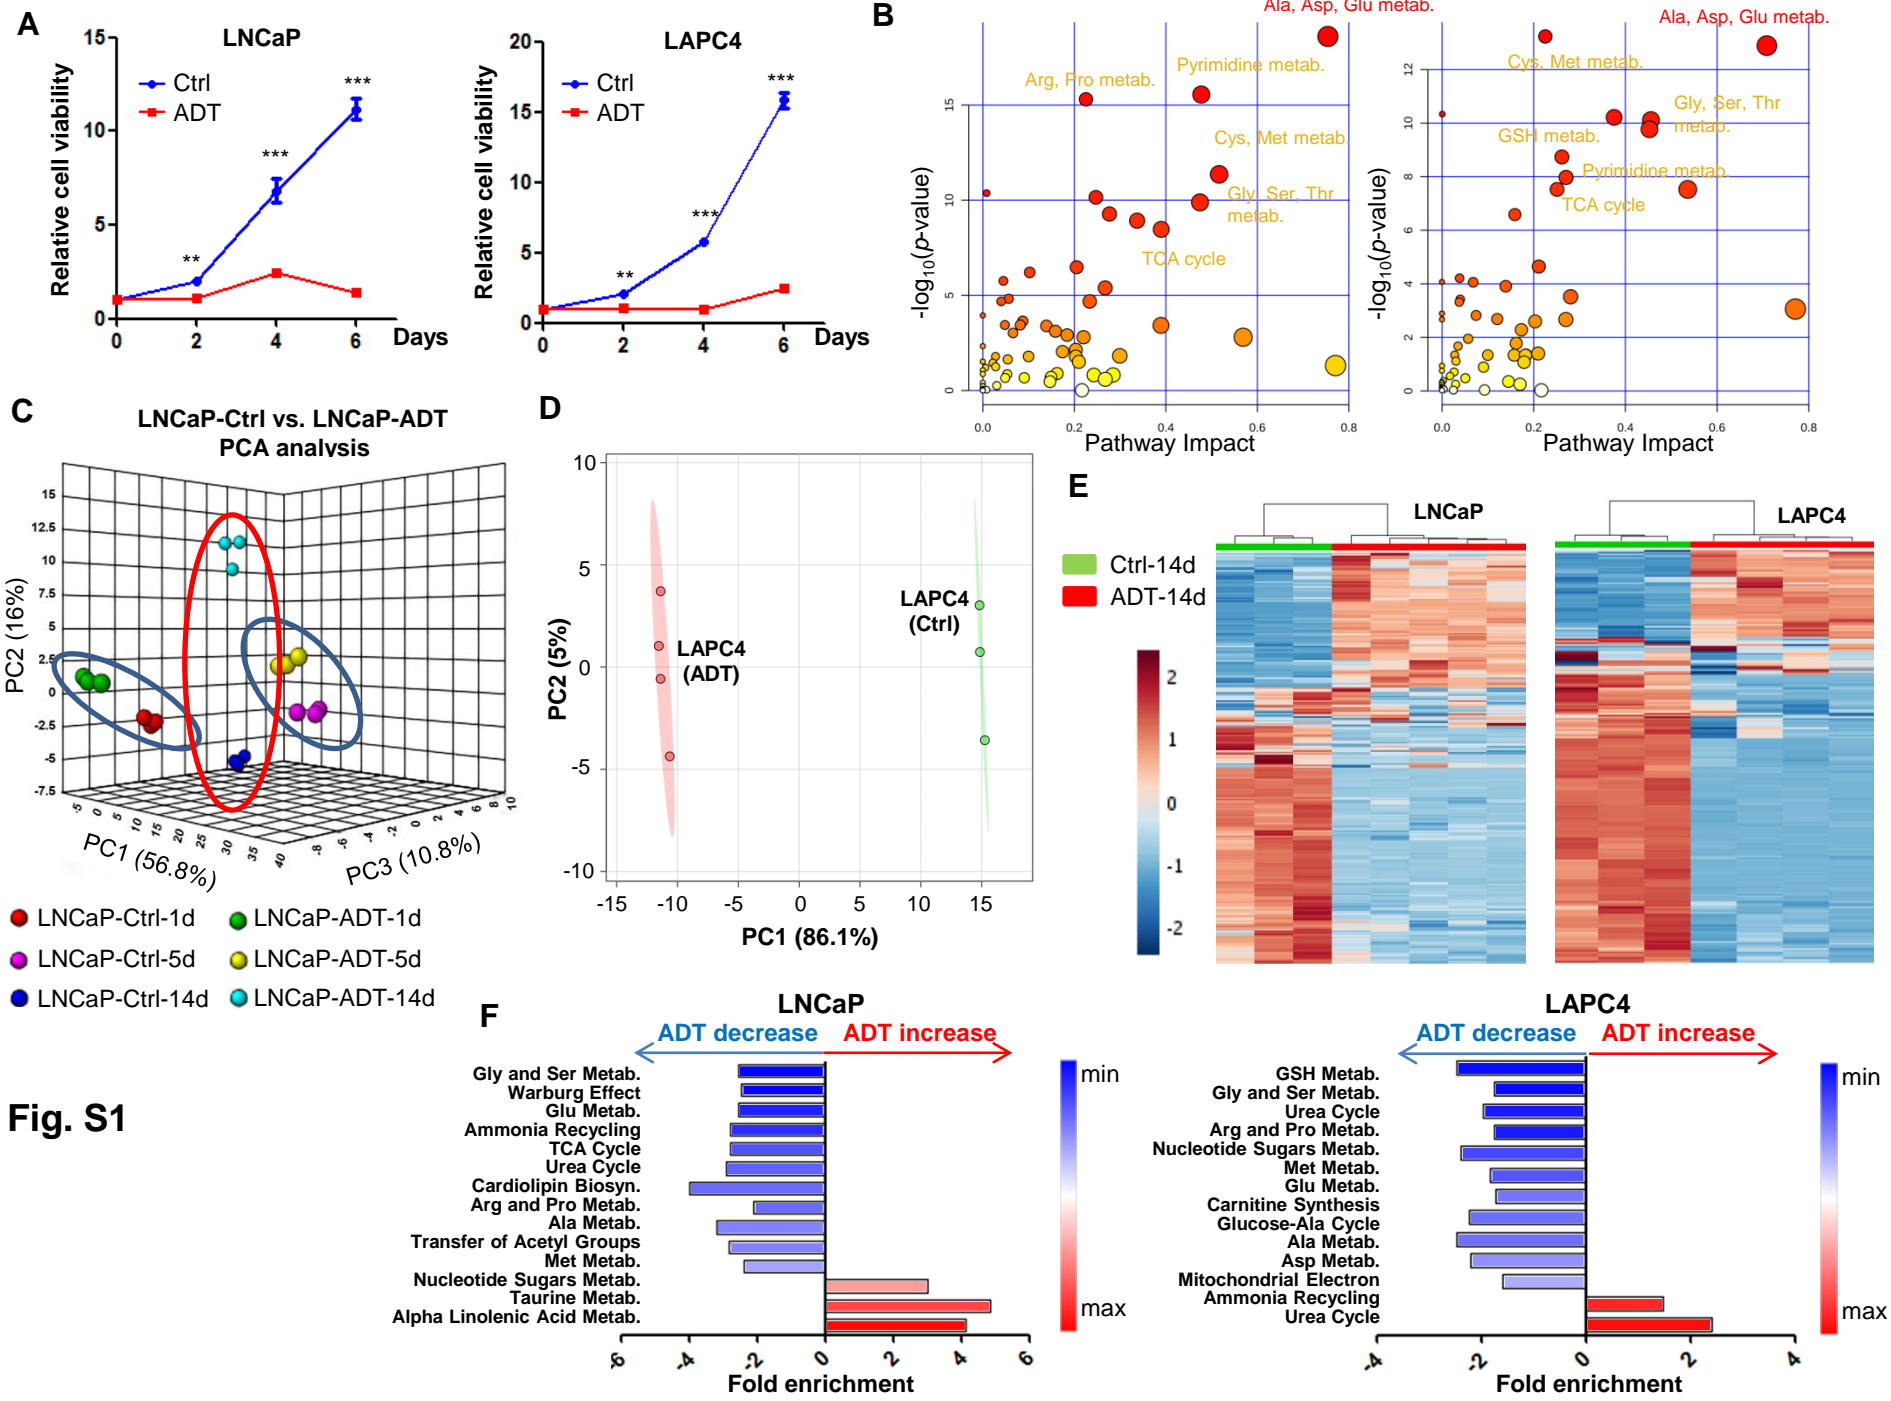

**Fig. S1. Androgen deprivation therapy metabolically inhibits tumor growth.** (A) Cell viability of LNCaP and LAPC4 cells treated with and without ADT (n = 3 replicates for two independent experiments). (B) Pathway impact analysis showing the significantly affected metabolic pathways by ADT in LNCaP and LAPC4 cells. (C) Principal component analysis of global metabolite changes upon androgen deprivation for LNCaP cells at day 1, day 5 and day14. (D) Principal component analysis of global metabolite changes upon androgen deprivation for LAPC4 cells at day 14. (E) Heat map analysis showing the alteration of global metabolite upon androgen withdrawal for LNCaP and LAPC4 cell at day 14. (F) Pathway enrichment analysis showing increased and decreased metabolic pathways after androgen withdrawal.

**Fig. S2**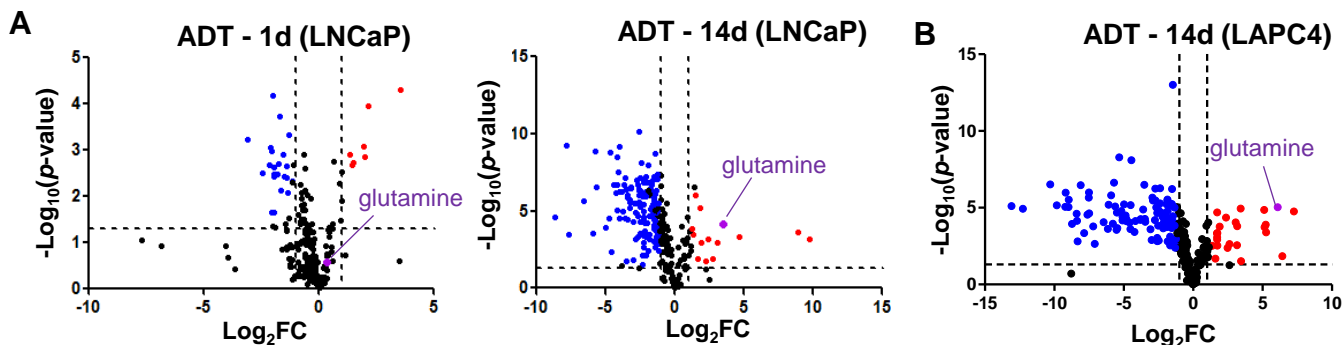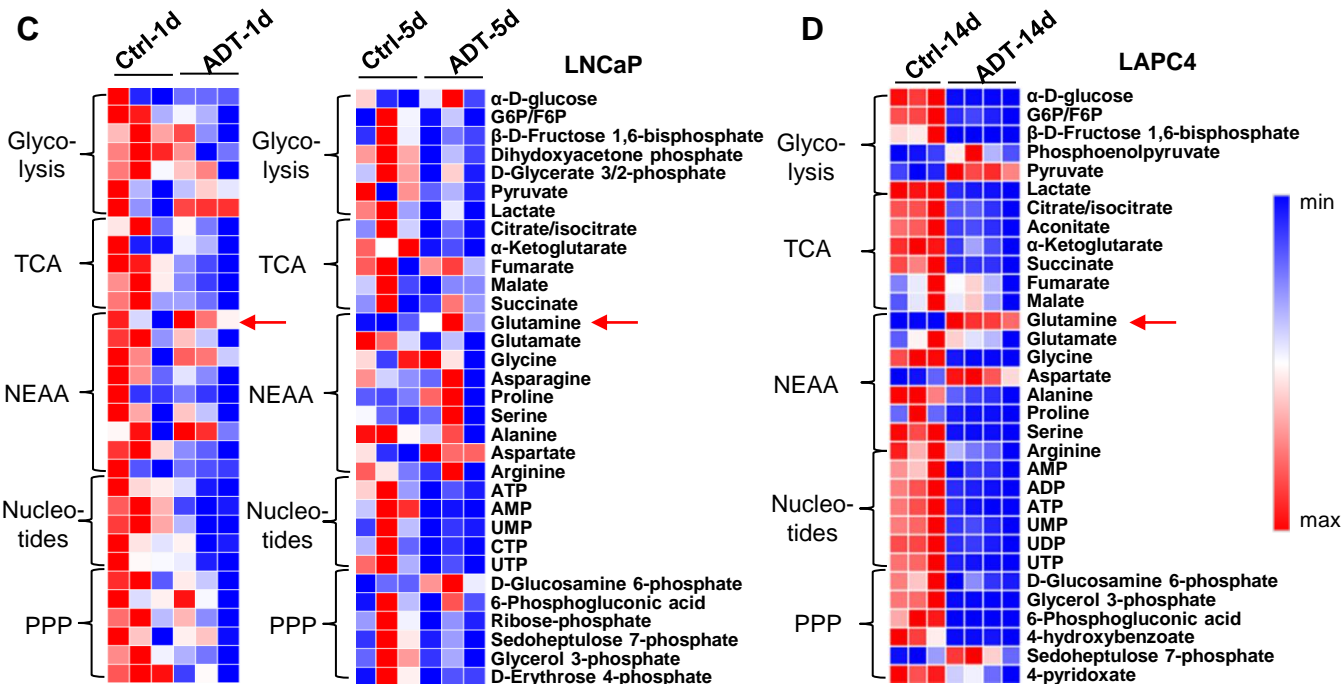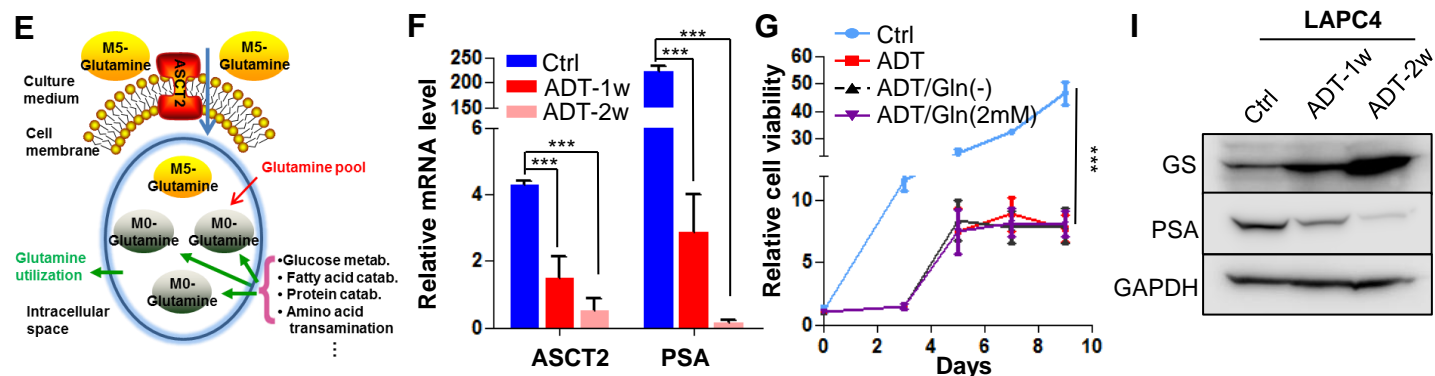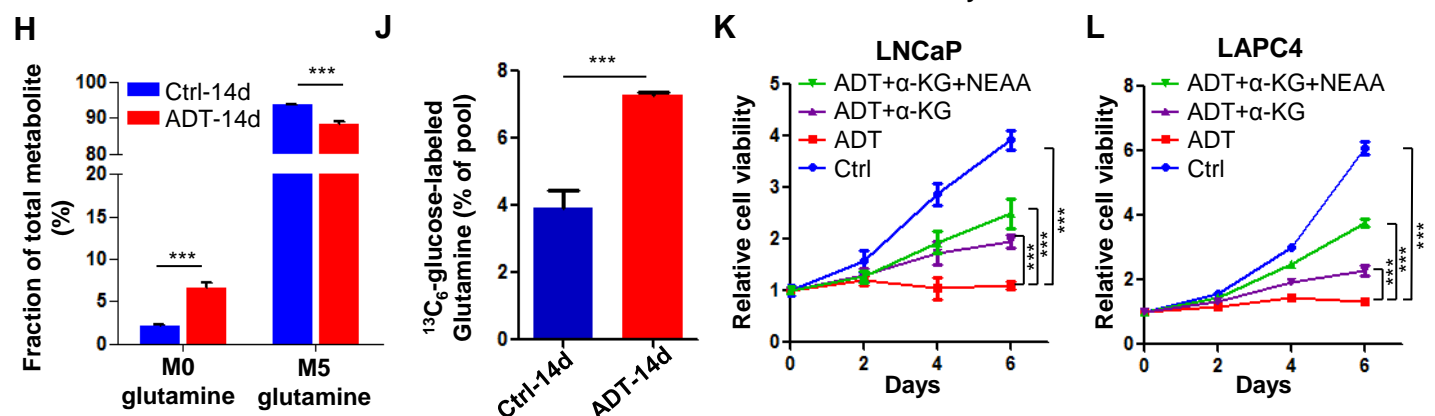

**Fig. S2. Androgen deprivation therapy leads to intracellular glutamine accumulation. (A and B)**

Volcano plots showing metabolite abundance in LNCaP and LAPC4 cells upon androgen deprivation at the indicated time points. **(C and D)** Heat maps showing the change of glutamine level in LNCaP and LAPC4 cells post ADT-treatment. **(E)** Schematic overview of the input and output of the intracellular glutamine pool. **(F)** Transcript level of glutamine transporter (ASCT2) and PSA upon ADT for 1 week and 3 weeks (n = 3 replicates for two independent experiments). **(G)** Relative cell viability of LNCaP cells treated with regular control media, charcoal-stripped media (ADT), ADT with depletion of glutamine (Gln) and ADT containing extra 2mM Gln (n = 3 replicates for two independent experiments). **(H)** Mass isotopomer analysis determining the intracellular M0-glutamine (synthesized from other source) and M5-glutamine (absorbed directly from culture media) levels in LNCaP cells after ADT treatment for 14 days (n = 3 cultures per group). **(I)** Western blot determining the expression of glutamine synthetase (GS) with and without androgen deprivation in LAPC4 cells. PSA was set as a positive control. **(J)** Relative fold change of glucose-labeled glutamine fraction in LAPC4 cells treated with and without ADT (n = 3 cultures per group). **(K and L)** Relative cell viability of LNCaP and LAPC4 cells treated with ADT, ADT supplemented with  $\alpha$ -KG (6 mM) or ADT supplemented with  $\alpha$ -KG (6 mM) and NEAA (2 mM) (n = 3 replicates for two independent experiments). Data are depicted as mean  $\pm$  s.d. \*\*\*  $P < 0.001$  by two-tailed Student's *t*-test.

**Fig. S3**

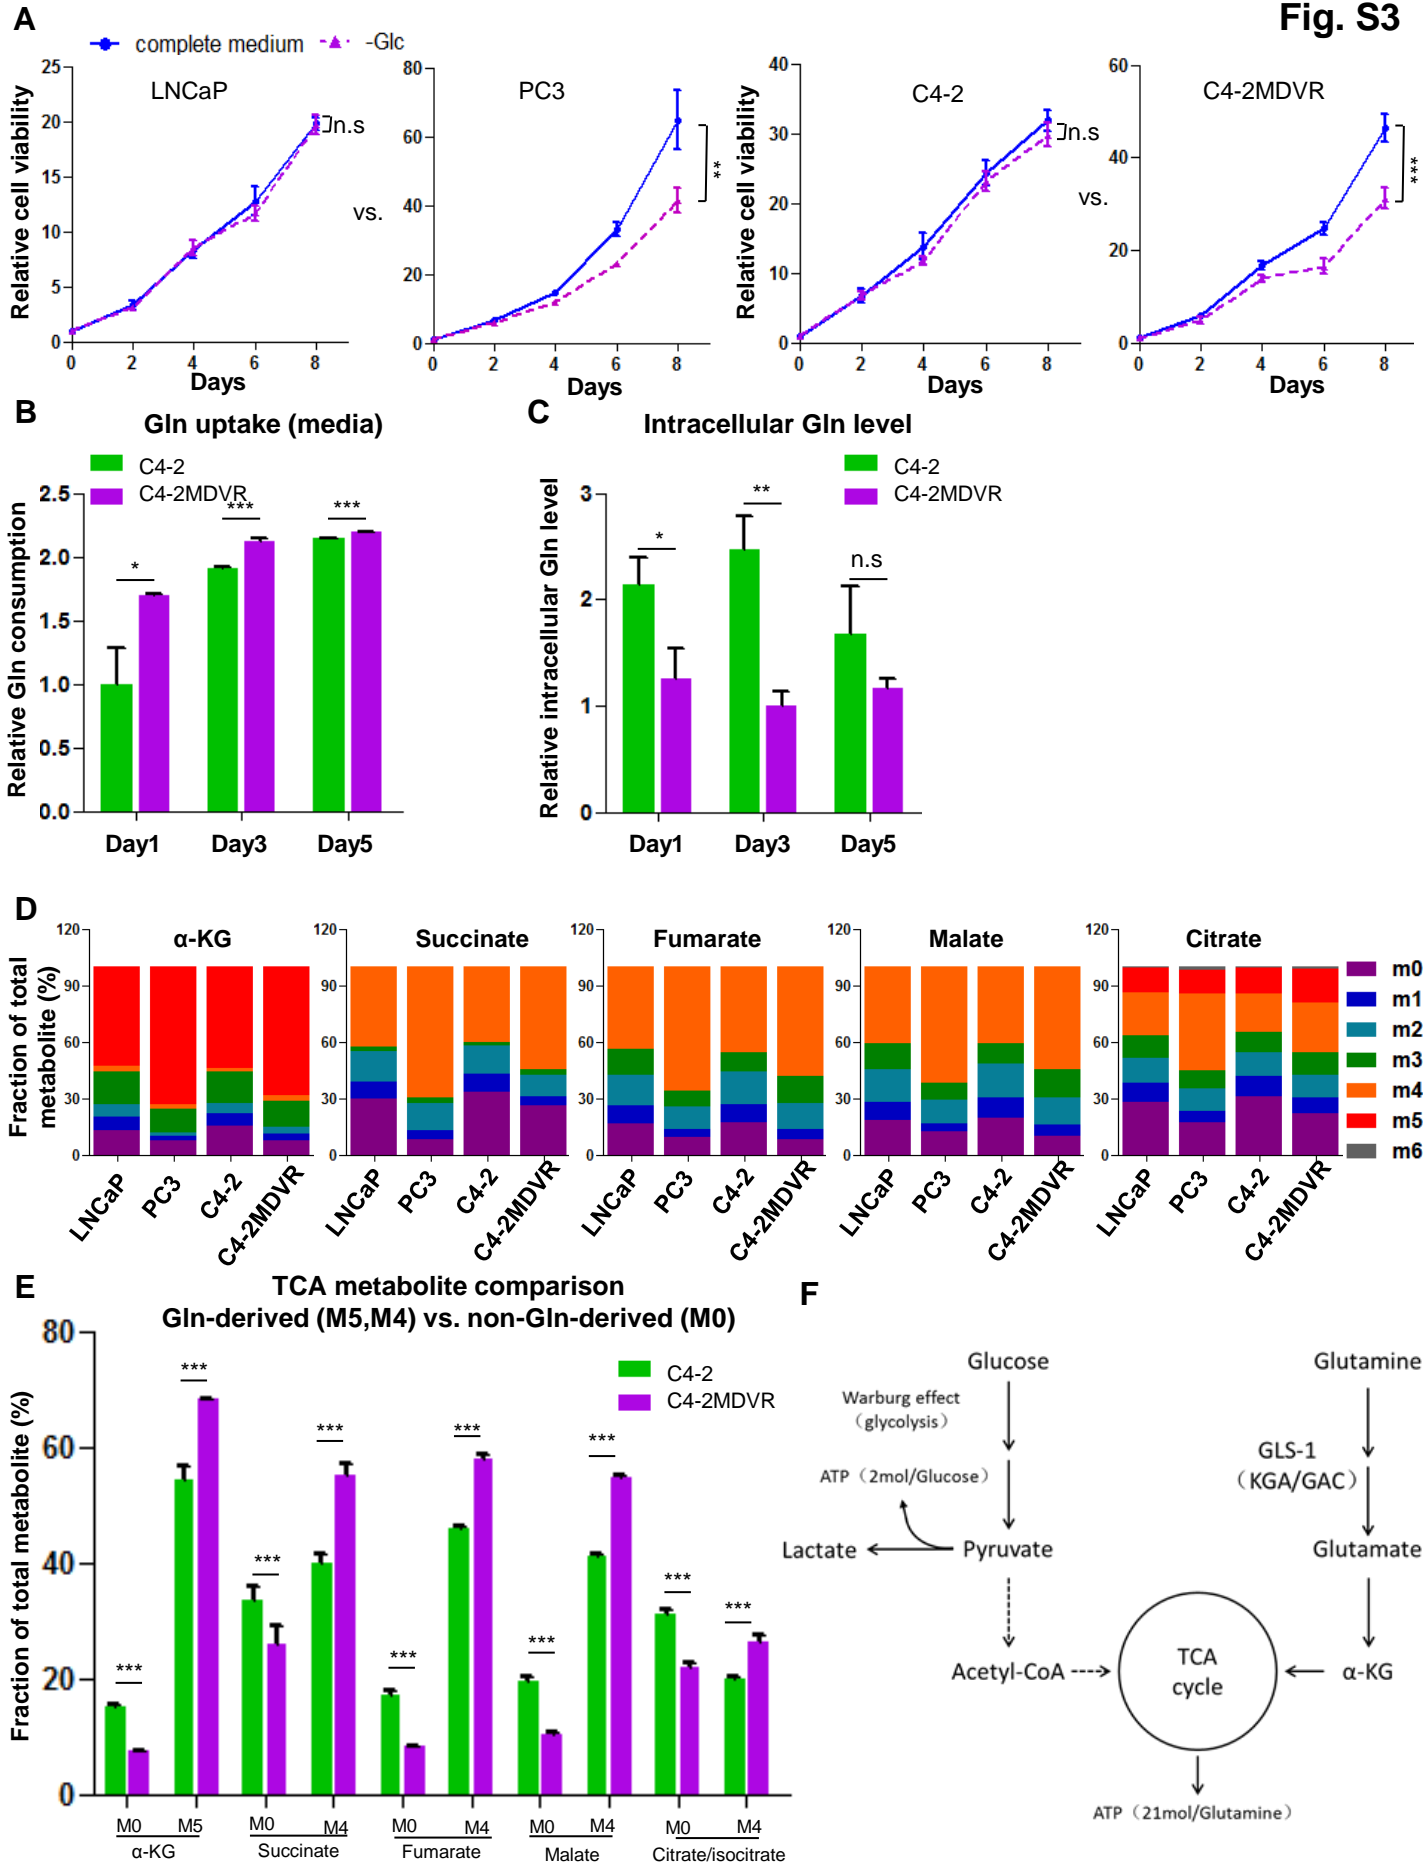



**Fig. S3. Therapy-resistant prostate cancer cells are much more dependent on glutamine metabolism.**

(A) Relative cell viability of LNCaP, PC3, C4-2 and C4-2MDVR cells treated with or without glucose depleting in the culture medium at the indicated time points (n = 3 replicates for two independent experiments). (B and C) UPLC-MS analysis of glutamine uptake and intracellular glutamine levels in C4-2 and C4-2MDVR cells (n = 3 cultures per group). (D) [U-<sup>13</sup>C<sub>5</sub>] glutamine tracing experiment determining all the fractions of total intracellular glutamine pool in indicated cell lines (n = 3 cultures per group). M5- $\alpha$ -KG, M4-succinate, M4-Fumarate, M4-malate and M4-citrate are all from labeled glutamine. M0 represents metabolites from other source not from labeled glutamine. (E) Mass isotopomer analysis of TCA cycle metabolite abundance in C4-2 and C4-2MDVR cells (n = 3 cultures per group). (F) Model depicting glutamine anaplerosis in therapy-resistant PCa. Data are depicted as mean  $\pm$  s.d. \*  $P < 0.05$ , \*\*  $P < 0.01$  and \*\*\*  $P < 0.001$  by two-tailed Student's *t*-test. n.s., not significant.

# Fig. S4

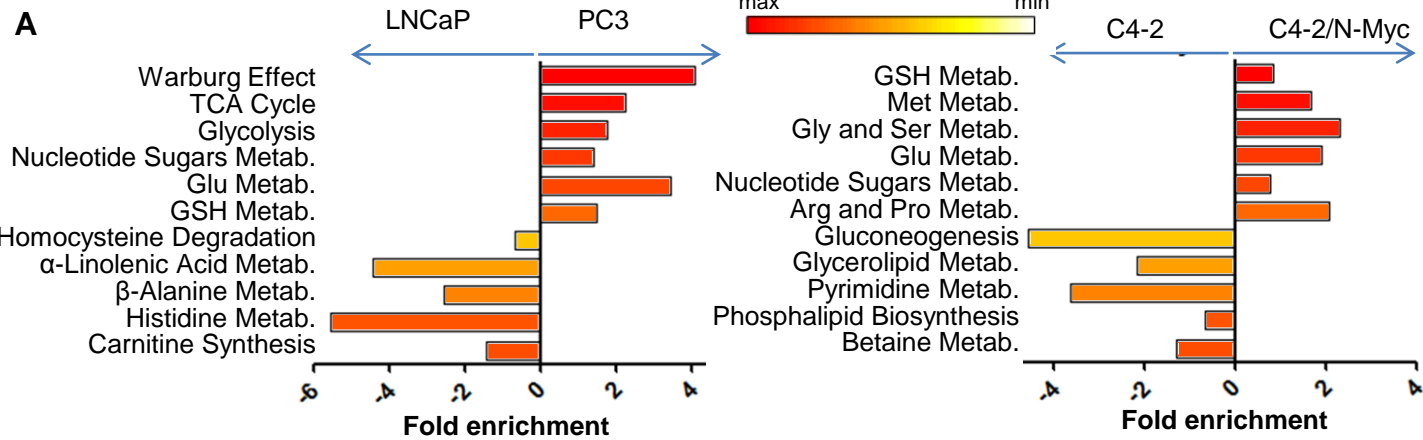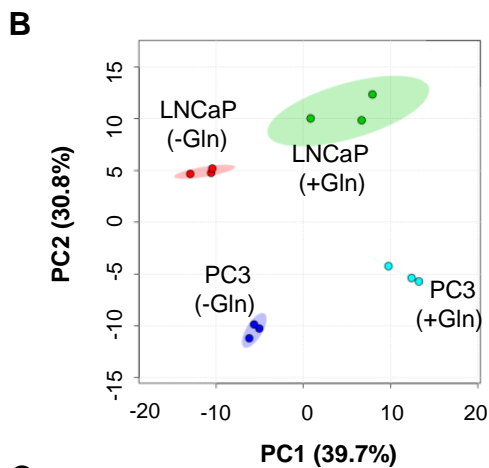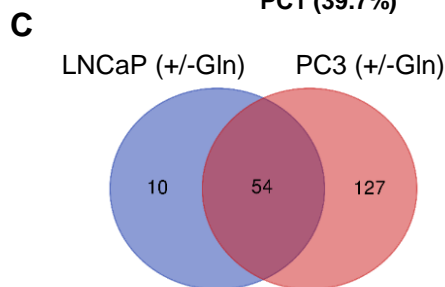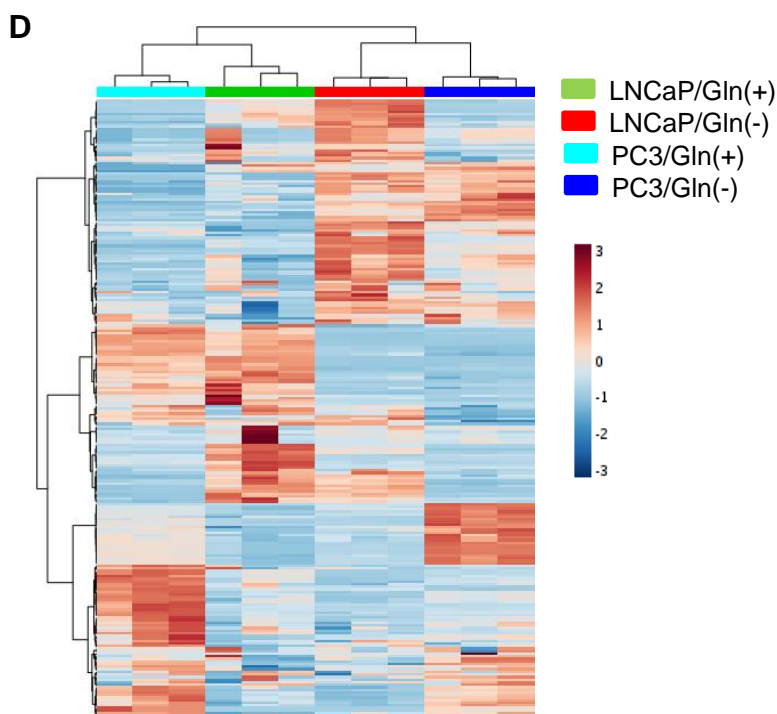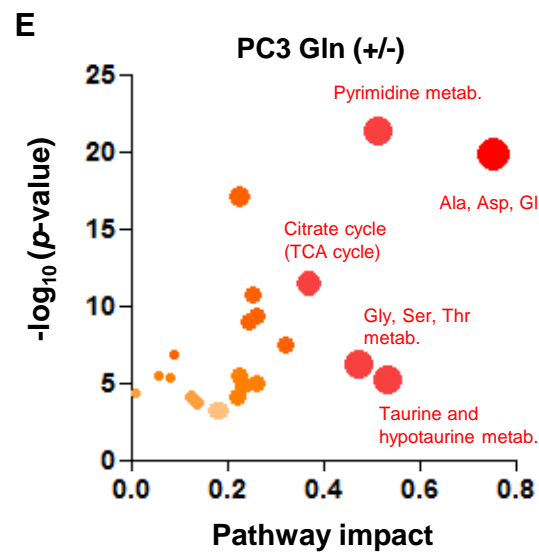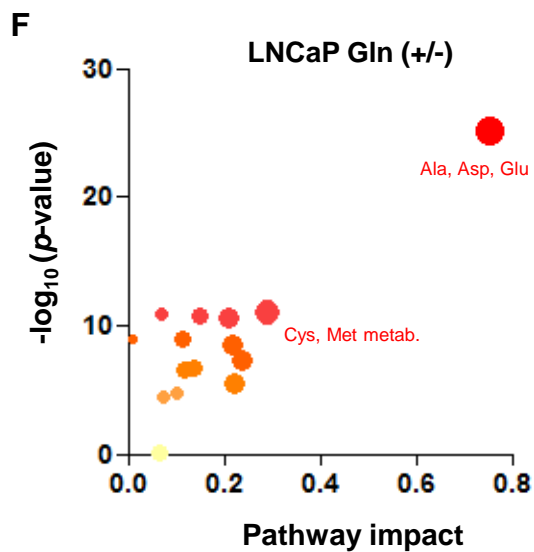

**Fig. S4. Global metabolic alterations upon glutamine deprivation.** (A) Pathway enrichment analysis showing the enriched metabolic pathways in the NE-like PCa cells (PC3 and C4-2/N-Myc) and their counterpart cells. (B, C and D) Principal component analysis, Venn diagram and heat map of global metabolite changes upon glutamine deprivation for LNCaP and PC3 cells ( $n = 3$  replicates for each group). (E and F) Pathway impact analysis showing the effect of glutamine deprivation on global metabolic pathways in PC3 and LNCaP cells.

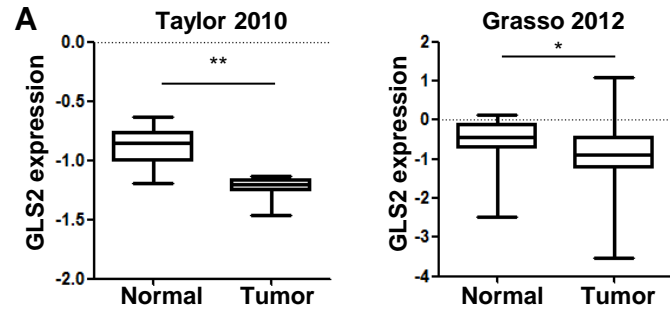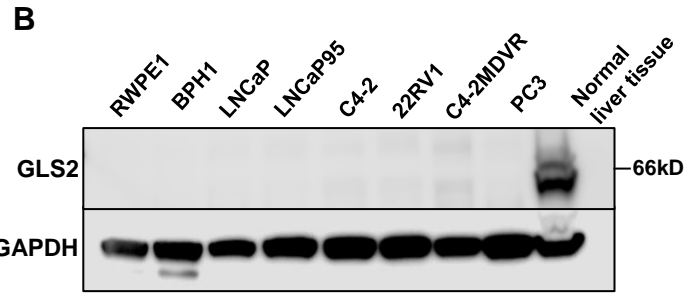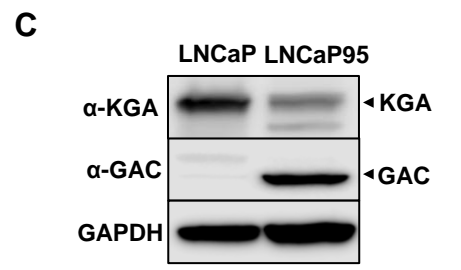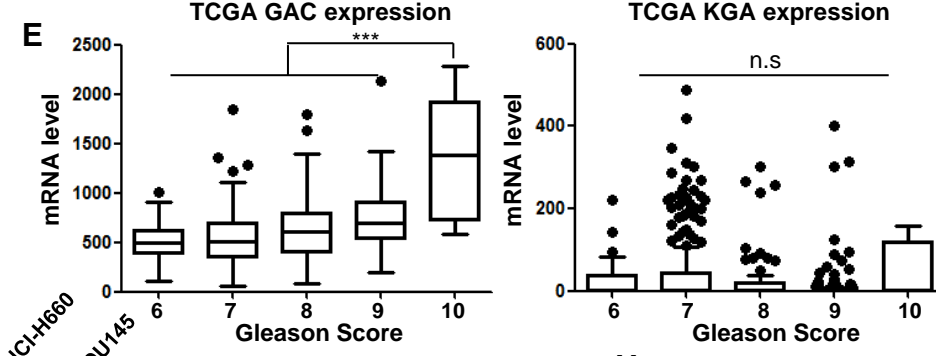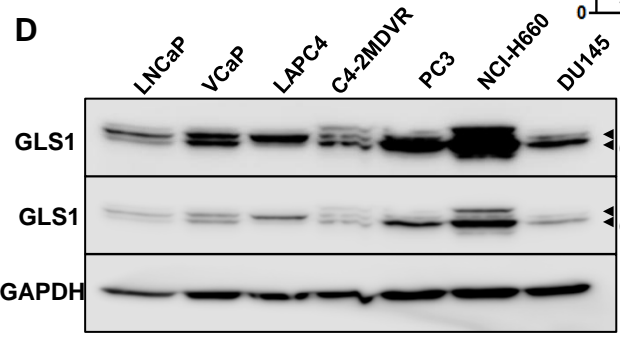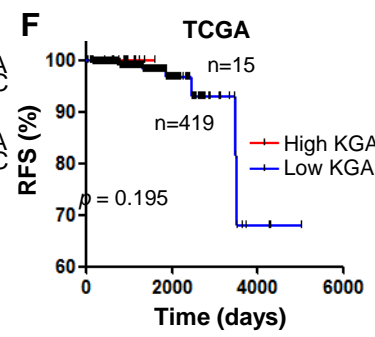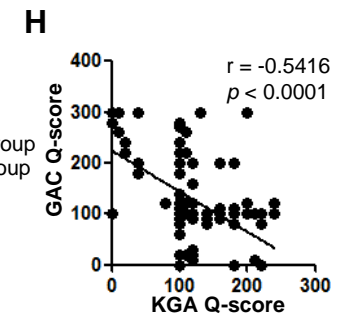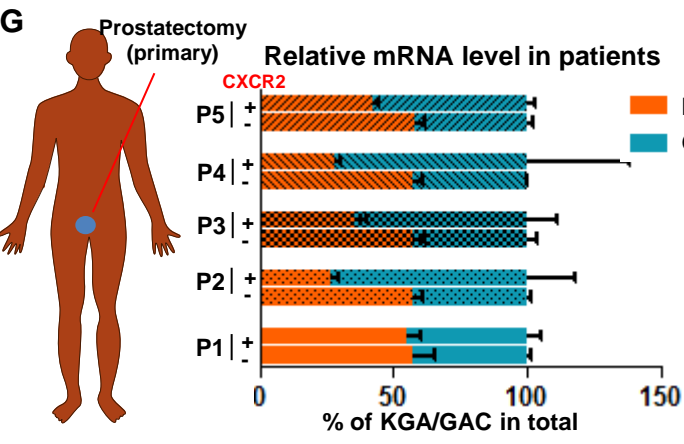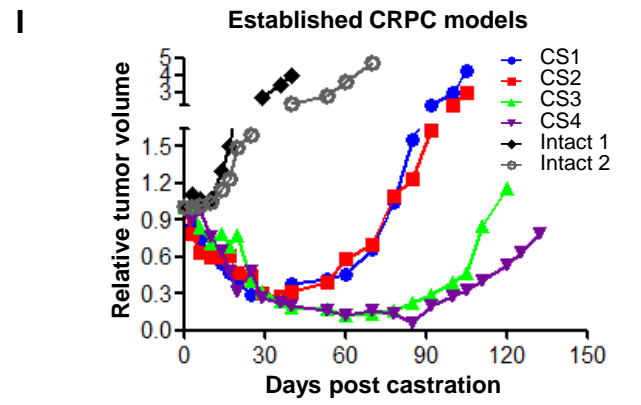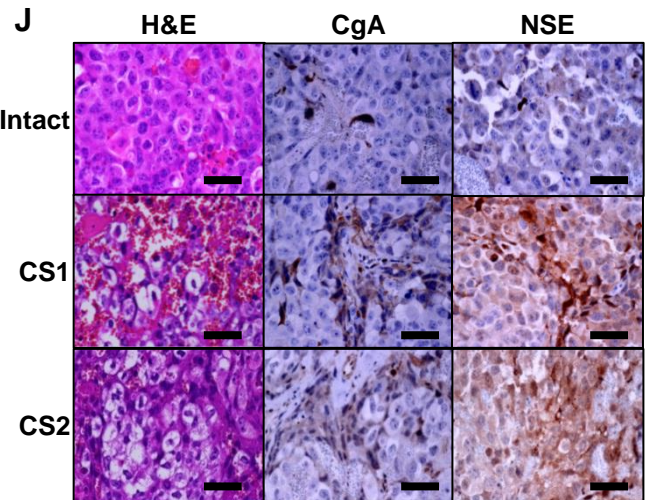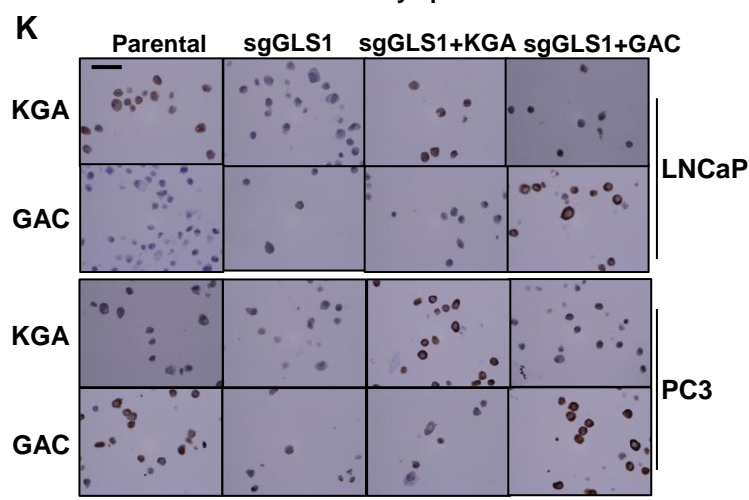

**Fig. S5. GLS1 switches the isoform from KGA to GAC alongside disease progression.** (A) GLS2 mRNA levels in normal prostatic tissues and PCa tissues. (B) Western blot determining GLS2 protein level in a panel of prostatic cell lines. Liver tissue sample is set as a positive control. (C) Western blot showing the differential expression of KGA and GAC in LNCaP and LNCaP95 cells detected by KGA and GAC specific antibodies. (D) Western blot showing GLS1 protein levels in a panel of androgen-dependent and androgen-independent PCa cell lines. Top GLS1 band was developed with longer exposure time. (E) mRNA levels of KGA and GAC in TCGA PCa tissues with different Gleason grades. (F) Recurrence-free survival (RFS) of patients stratified by KGA mRNA expression in TCGA dataset. Log rank (Mantel-Cox) test. (G) Transcript levels of KGA and GAC in CXCR2-positive NE-like and CXCR2-negative luminal-like cells sorted from fresh PCa tissues. (H) The Pearson analysis determining the correlation between KGA and GAC staining scores in adenocarcinoma, CRPC and SCNC TMA tissues. (I) Tumor growth curves of LNCaP xenografts showing the established CRPC animal models upon surgical castration (CS) and the corresponding intact tumors. Day 0 denotes the surgical castration time point. (J) Hematoxylin and eosin staining (H&E) and IHC staining for detecting NE markers CgA, NSE and SYP expression in intact tumors and CRPC tumors (CS). Scale bar, 40  $\mu$ m. (K) Immunocytochemical staining on genetically modified prostate cancer cell lines of GLS1 knockout and specific KGA or GAC expression to confirm the specificity of the antibodies. Scale bar, 40  $\mu$ m.

**Fig. S6**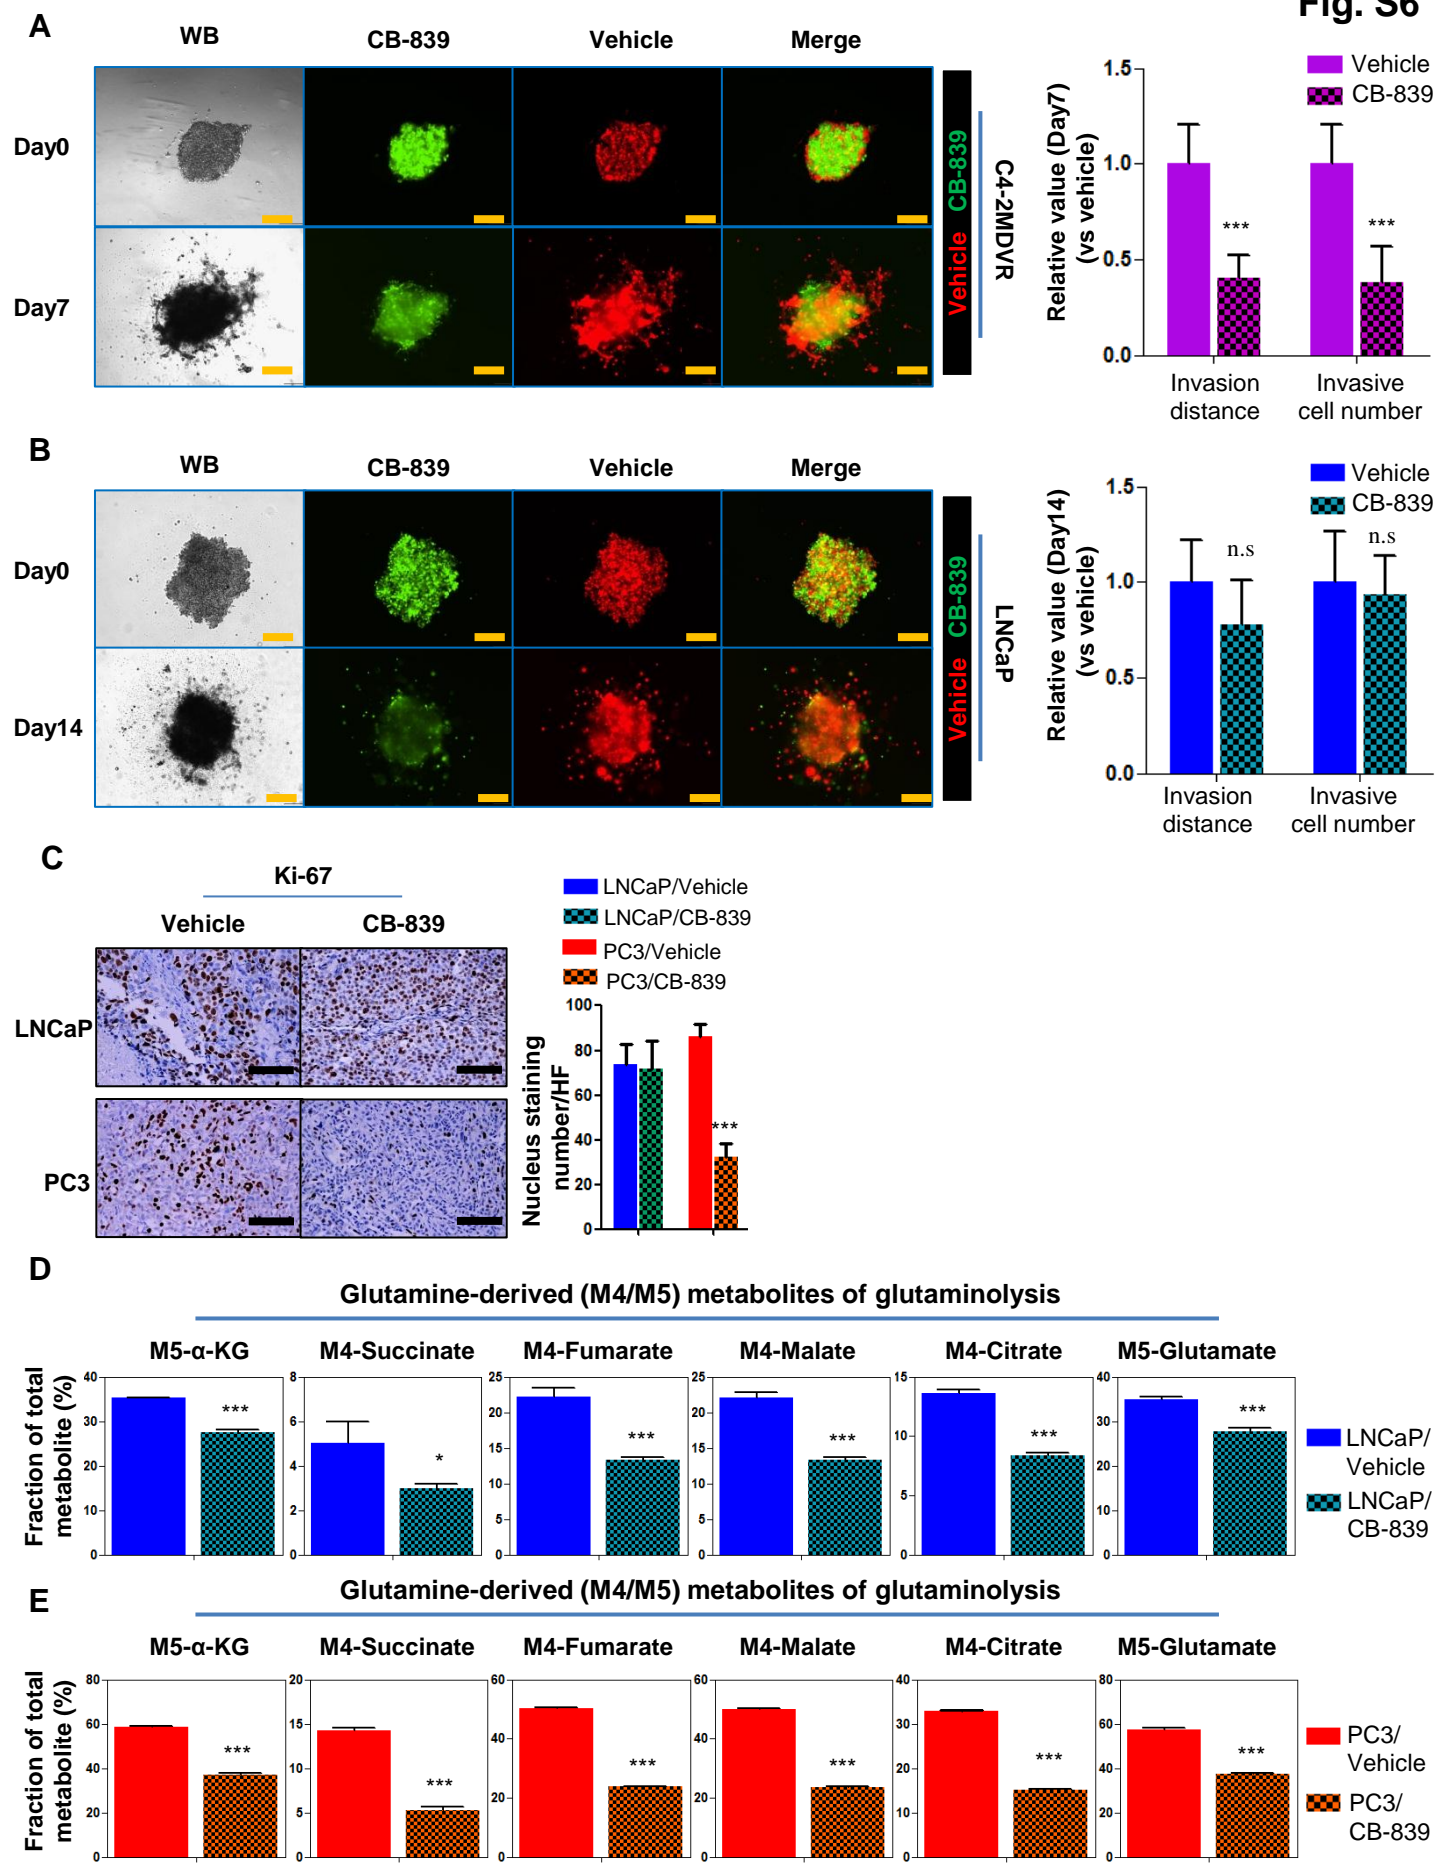

**Fig. S6. GLS1 selective inhibitor CB-839 exhibits a more profound inhibitory effect on therapy-resistant prostate cancer. (A and B)** Spheroid invasion assay determining the inhibitory effect of CB-839 on the migration of C4-2MDVR and LNCaP cells (n = 3 replicates for two independent experiments). Representative images (left) and quantifications of relative invading cells (right) are shown. Cells labeled RFP or GFP denote those cultured with vehicle or CB-839, respectively. Scale bar, 200  $\mu\text{m}$ . **(C)** IHC staining for the LNCaP and PC3 xenograft tumors to determine the expression of proliferative markers (Ki67). Scale bar, 40  $\mu\text{m}$ . **(D and E)** Mass isotopomer analysis of glutamine-derived intermediates level in LNCaP and PC3 cells after treatment with vehicle or CB-839 for 72 hours (n = 3 cultures per group). Data are depicted as mean  $\pm$  s.d. \*  $P < 0.05$  and \*\*\*  $P < 0.001$  by two-tailed Student's *t*-test. n.s., not significant.

**Fig. S7**

**A**

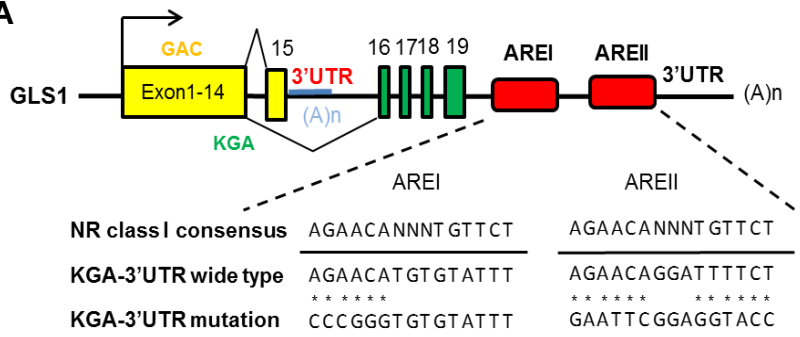

**B**

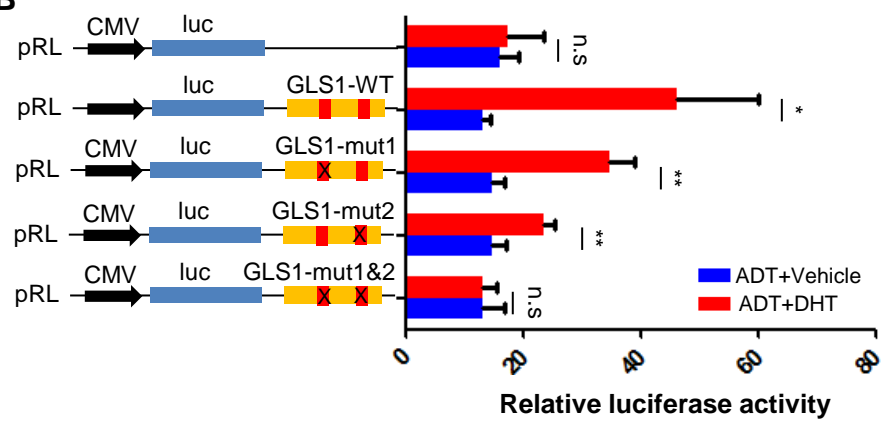

**C**

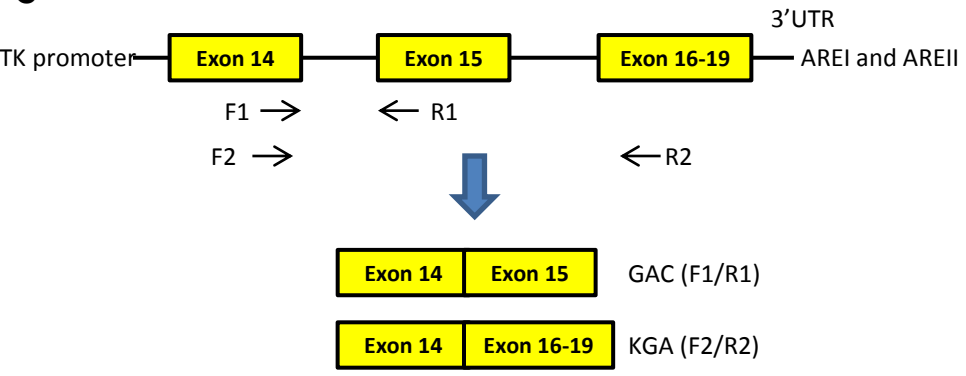

**D**

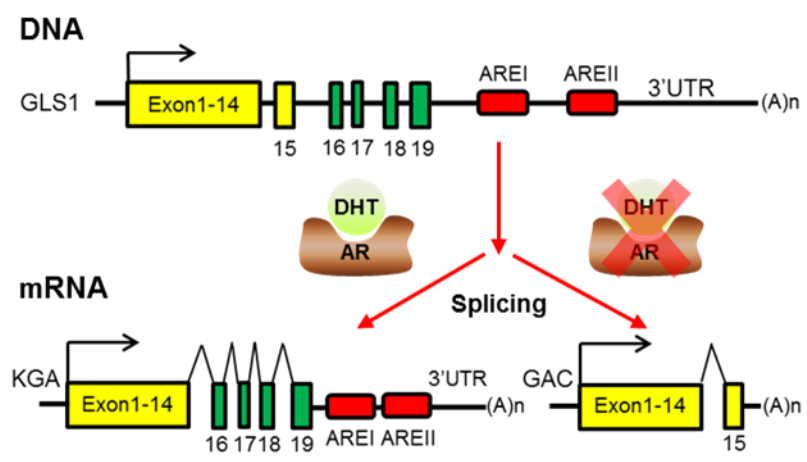



**Fig. S7. *GLS1* gene is regulated by transcription-coupled RNA splicing of AR.** (A) Structure of *GLS1* with two putative androgen response elements (AREI and II) identified in *GLS1*-3'UTR. Asterisk signs denote mutated sites. (B) Luciferase activity of pRL and modified constructs containing wild type (wt) *GLS1*-3'UTR or mutant (mut) *GLS1*-3'UTR (n = 3 replicates per group). Schematic of luciferase reporter constructs are shown on the left. (C) Diagram of the *GLS1* minigene reporter. Exons, introns and PCR primers used to detect exon splicing are indicated in the diagram. Splicing between exons 14 and 15 reflects formation of GAC mRNA, which can be detected by the F1/R1 primer pair. Splicing between exons 14 and 16-19 reflects formation of KGA mRNA, which can be detected by the F2/R2 primer pair. (D) Working model depicting AR-mediated *GLS1* gene transcription and splicing. Data are depicted as mean  $\pm$  s.d. \*  $P < 0.05$ , \*\*  $P < 0.01$  and \*\*\*  $P < 0.001$  by two-tailed Student's *t*-test. n.s., not significant.

**Fig. S8**

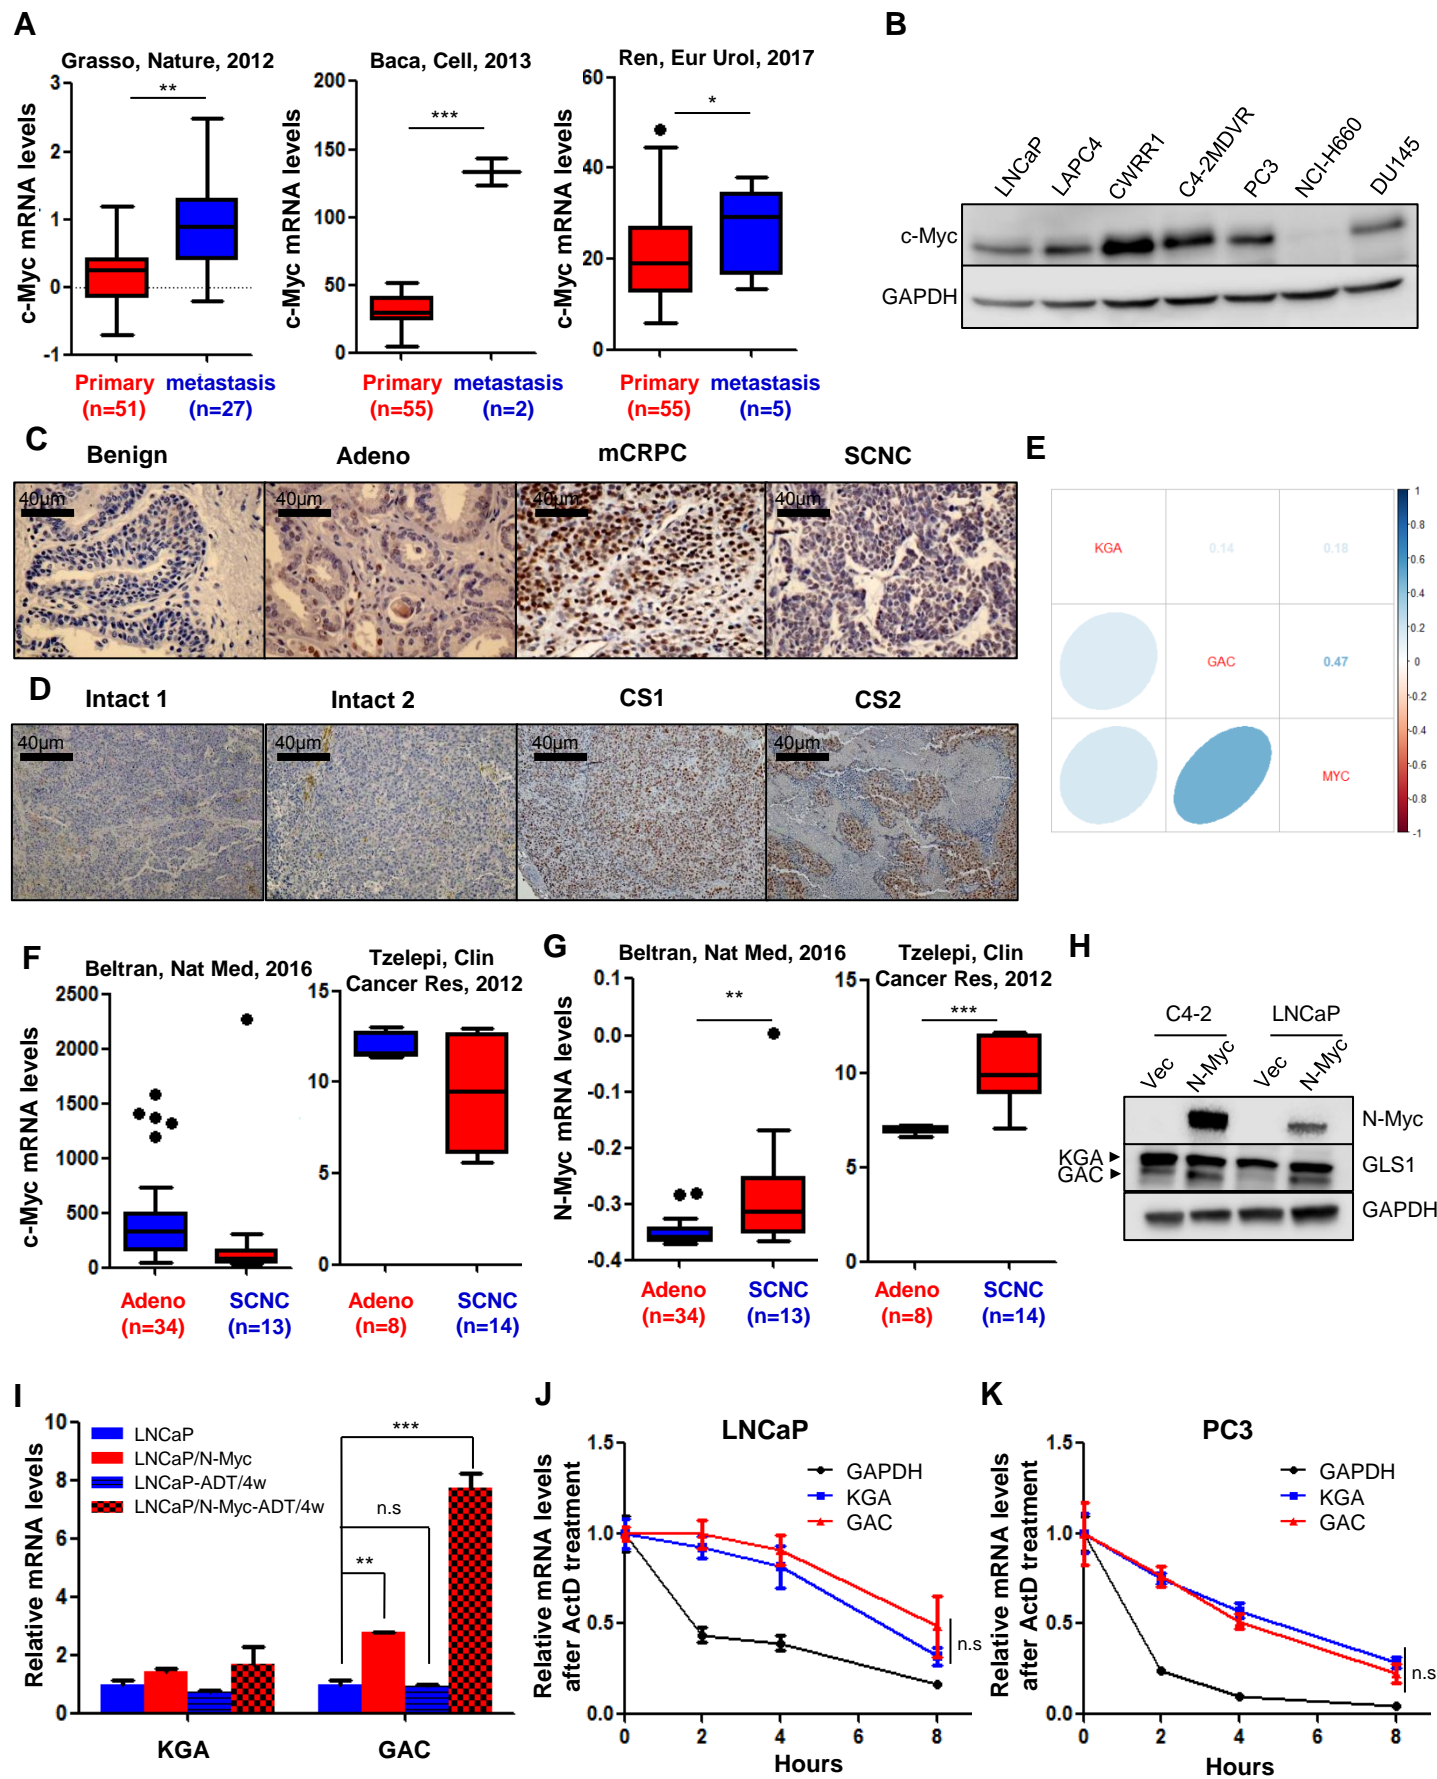

**Fig. S8. MYC induces GAC expression.** (A) c-Myc mRNA level in primary and metastatic PCa tissues. (B) Western blot determining c-Myc protein level in a panel of PCa cell lines. (C) IHC staining of c-Myc expression in benign prostate, adenocarcinoma, mCRPC and SCNC tissues. Scale bar, 40  $\mu$ m. (D) IHC staining of c-Myc expression in intact and surgical castration (CS)-induced CRPC animal tumors. Scale bar, 40  $\mu$ m. (E) Correlation analysis between KGA, GAC and c-Myc transcript level in TCGA dataset. (F and G) c-Myc and N-Myc mRNA levels in adenocarcinoma and SCNC tissues. (H) Western blot determining KGA and GAC expression by probed with GLS1 antibody after overexpressing N-Myc in C4-2 and LNCaP cells. (I) Transcript level of KGA and GAC in LNCaP cells with N-Myc overexpression, ADT treatment or combination (n = 3 replicates per group). (J and K) KGA and GAC transcript levels in LNCaP and PC3 cells after actinomycin D (ActD) treatment at indicated time points (n = 3 replicates per group). Results were normalized to 18s rRNA, whose level was not affected by ActD treatment. GAPDH was set a positive control. Data are depicted as mean  $\pm$  s.d. \*  $P < 0.05$ , \*\*  $P < 0.01$  and \*\*\*  $P < 0.001$  by two-tailed Student's *t*-test. n.s., not significant.

**Table S1. Primers used for PCR, mutagenesis and sequencing in luciferase assay study.**

| Name                           | Sequence                                                       | Comments                                                                                  |
|--------------------------------|----------------------------------------------------------------|-------------------------------------------------------------------------------------------|
| GLS1-3'UTR-PC<br>R-F           | ATATAAA <b>TCTAGAT</b> TGGTCTCAAATCCCAAGATTT<br>AAATCACTT      | <i>XbaI/NotI</i> linker for<br>GLS1-3'UTR PCR<br>products, cloned into<br>pRL-CMV plasmid |
| GLS1-3'UTR-PC<br>R-R           | TTTAATA <b>GCGGCCG</b> GATACATATATTTATTATG<br>CTGTAAAAAGCAA    |                                                                                           |
| GLS1-3'UTR-AR<br>EI-mut-F      | GTGGAAAATGATTATG <b>Acccggg</b> TGTATTTCTATCT<br>GGTAGTGATG    | Mutate sites AGAACA<br>(AREI) to CCCGGG<br>( <i>SmaI</i> )                                |
| GLS1-3'UTR-AR<br>EI-mut-R      | CATCACTACCAGATAGAAATAC <b>Acccggg</b> TCATAAT<br>CATTTTCCAC    |                                                                                           |
| GLS1-3'UTR-AR<br>EII-mut1-F    | GGGGCTTCAAAAAACGGAT <b>gaattc</b> GGATTTTCTAG<br>GAGTTACACATAC | Mutate sites AGAACA<br>(AREII) to GAATTC<br>( <i>EcoRI</i> )                              |
| GLS1-3'UTR-AR<br>EII-mut1-R    | GTATGTGTA <b>ACTCCTAGAAAATCCgaattc</b> ATCCGTT<br>TTTTGAAGCCCC |                                                                                           |
| GLS1-3'UTR-AR<br>EII-mut1-2-F  | GGGGCTTCAAAAAACGGAT <b>gaattc</b> GGAggtaccAGGA<br>GTTACACATAC | Mutate sites TTTTCT<br>(AREII2) to GGTACC<br>( <i>KpnI</i> )                              |
| GLS1-3'UTR-AR<br>EII-mut1-2-R  | GTATGTGTA <b>ACTCCTggtaccTCCgaattc</b> ATCCGTTTTT<br>TGAAGCCCC |                                                                                           |
| pRL-GLS1-3'UT<br>R-seq-F       | AGATGCACCTGATGAAATGGGA                                         | Primers for modified<br>reporter plasmids<br>sequencing                                   |
| pRL-GLS1-3'UT<br>R-seq-R       | AGCATTTTTTTC <b>ACTGCATTCTAGTTGT</b>                           |                                                                                           |
| GLS1-3'UTR-AR<br>EI-mut-seq-F  | AGATGCACCTGATGAAATGGGA                                         | Primers for<br>GLS1-3'UTR AREI<br>mutation sites<br>sequencing                            |
| GLS1-3'UTR-AR<br>EI-mut-seq-R  | AGACATTTTAAACACACAACCGT                                        |                                                                                           |
| GLS1-3'UTR-AR<br>EII-mut-seq-F | AGTAAGTCAGAAAATGCCTCCTAT                                       | Primers for<br>GLS1-3'UTR AREII<br>mutation sites<br>sequencing                           |
| GLS1-3'UTR-AR<br>EII-mut-seq-R | GCTTAATATCAGAACTCCTCACTAAC                                     |                                                                                           |

**Table S2. PCR, qPCR primers and shRNA targeted sequences used in this study.**

| <b>Gene</b>    | <b>Sequence</b>                        | <b>Description</b>      |
|----------------|----------------------------------------|-------------------------|
| KGA-F          | ACTGGAGATGTGTCTGCACTTCGAAG             | qPCR primer             |
| KGA-G          | CCAAAGTGCAGTGCTTCATCCATGGGAGTG         | qPCR primer             |
| GAC-F          | TTGGACTATGAAAGTCTCCAACAAGAAC           | qPCR primer             |
| GAC-R          | CCATTCTATATACTACAGTTGTAGAGATGTCCT<br>C | qPCR primer             |
| GLS1-F         | TGCATTCCTGTGGCATGTAT                   | qPCR primer             |
| GLS1-R         | TTGCCCATCTTATCCAGAGG                   | qPCR primer             |
| SLC1A5-F       | CATCATCCTCGAAGCAGTCA                   | qPCR primer             |
| SLC1A5-R       | CTCCGTACGGTCCACGTAAT                   | qPCR primer             |
| PSA-F          | GATGAAACAGGCTGTGCCG                    | qPCR primer             |
| PSA-R          | CCTCACAGCTACCCACTGCA                   | qPCR primer             |
| Actin-F        | AGAGCTACGAGCTGCCTGAC                   | qPCR primer             |
| Actin-R        | AGCACTGTGTTGGCGTACAG                   | qPCR primer             |
| KGA shRNA1     | GGGTAAAGTCAGTGATAAATC                  | shRNA targeted sequence |
| KGA shRNA2     | GCACTTCGAAGATTTGCTTTG                  | shRNA targeted sequence |
| KGA shRNA3     | GAACAGCGGGACTATGATTCT                  | shRNA targeted sequence |
| KGA shRNA4     | GAATAACACTCCCATGGATGA                  | shRNA targeted sequence |
| GAC shRNA1     | CTTTGGACCATTGGACTATGA                  | shRNA targeted sequence |
| GAC shRNA2     | GTCAAATGAGGACATCTCTAC                  | shRNA targeted sequence |
| GAC shRNA3     | GAATGGAAAGTCTGGGAGAGA                  | shRNA targeted sequence |
| GAC shRNA4     | GCAGGTAGTAAGTATGCTACT                  | shRNA targeted sequence |
| GLS1-ChIP-F    | TGGTCTCAAATCCCAAGATTTAAAT              | ChIP-qPCR primer        |
| GLS1-ChIP-R    | GACAGGATAAAATGTATGTGTA ACTCC           | ChIP-qPCR primer        |
| PSA-enh-ChIP-F | TGGGACA ACTTGCAAACCTG                  | ChIP-qPCR primer        |
| PSA-enh-ChIP-R | CCAGAGTAGGTCTGTTTTCAATCCA              | ChIP-qPCR primer        |

**Table S3. Antibodies used in this study**

| <b>Assay</b> | <b>Antibody</b> | <b>Company</b> | <b>Cat#</b> | <b>Dilution</b> |
|--------------|-----------------|----------------|-------------|-----------------|
| WB           | Glutaminase     | Abcam          | Ab93434     | 1:1000          |
|              | KGA             | Proteintech    | 20170-1-AP  | 1:1000          |
|              | GAC             | Proteintech    | 19958-1-AP  | 1:1000          |
|              | PSA             | Dako           | A0562       | 1:200           |
|              | ASCT2           | Cell Signaling | 8057        | 1:1000          |
|              | GS              | Santa Cruz     | sc-74430    | 1:200           |
|              | AR              | Millipore      | ab561       | 1:1000          |
|              | GAPDH           | Abcam          | ab9484      | 1:5000          |
|              | GLS2            | Abcam          | ab113509    | 1:1000          |
|              | c-Myc           | Abcam          | ab32072     | 1:1000          |
|              | N-Myc           | Santa Cruz     | sc-53993    | 1:200           |
|              | $\beta$ -actin  | Sigma          | A5441       | 1:3000          |
| IHC          | KGA             | Proteintech    | 20170-1-AP  | 1:800           |
|              | GAC             | Proteintech    | 19958-1-AP  | 1:100           |
|              | Synaptophysin   | Biocare        | CM371       | 1:100           |
|              | Chromogranin A  | Thermo Fisher  | PA5-32349   | 1:500           |
|              | NSE             | Abcam          | ab53025     | 1:200           |
|              | Ki67            | Thermo Fisher  | RM-9106     | 1:300           |
|              | c-Myc           | Abcam          | ab32072     | 1:100           |
| ChIP         | AR              | Abcam          | ab74272     | 1 $\mu$ g/ml    |
|              | IgG             | Millipore      | 12-370      | 1 $\mu$ g/ml    |

## SI References

1. Pan M, *et al.* (2016) Regional glutamine deficiency in tumours promotes dedifferentiation through inhibition of histone demethylation. *Nat Cell Biol* 18(10):1090-1101.
2. Park JW, *et al.* (2018) Reprogramming normal human epithelial tissues to a common, lethal neuroendocrine cancer lineage. *Science* 362(6410):91-95.
3. Wang QB, Carroll JS, & Brown M (2005) Spatial and temporal recruitment of androgen receptor and its coactivators involves chromosomal looping and polymerase tracking. *Mol Cell* 19(5):631-642.
4. Huang JT, *et al.* (2005) Differential expression of interleukin-8 and its receptors in the neuroendocrine and non-neuroendocrine compartments of prostate cancer. *Am J Pathol* 166(6):1807-1815.
5. Park JW, Lee JK, Witte ON, & Huang J (2017) FOXA2 is a sensitive and specific marker for small cell neuroendocrine carcinoma of the prostate. *Modern pathology : an official journal of the United States and Canadian Academy of Pathology, Inc* 30(9):1262-1272.
6. Yin Y, *et al.* (2019) N-Myc promotes therapeutic resistance development of neuroendocrine prostate cancer by differentially regulating miR-421/ATM pathway. *Molecular cancer* 18(1):11.
7. Vinci M, Box C, & Eccles SA (2015) Three-Dimensional (3D) Tumor Spheroid Invasion Assay. *Jove-J Vis Exp* (99).
8. Gross MI, *et al.* (2014) Antitumor activity of the glutaminase inhibitor CB-839 in triple-negative breast cancer. *Molecular cancer therapeutics* 13(4):890-901.
